# Supplementary material
Source: MDPI journal article supplement (https://www.mdpi.com/2076-3271/5/4/35)
Supplement: s1 [file s1]

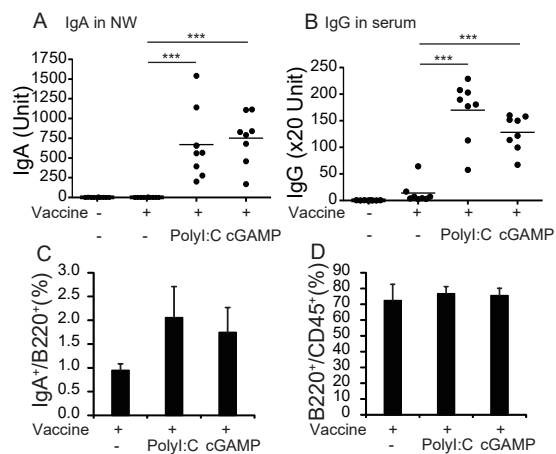

Takaki et. al., Figure 1

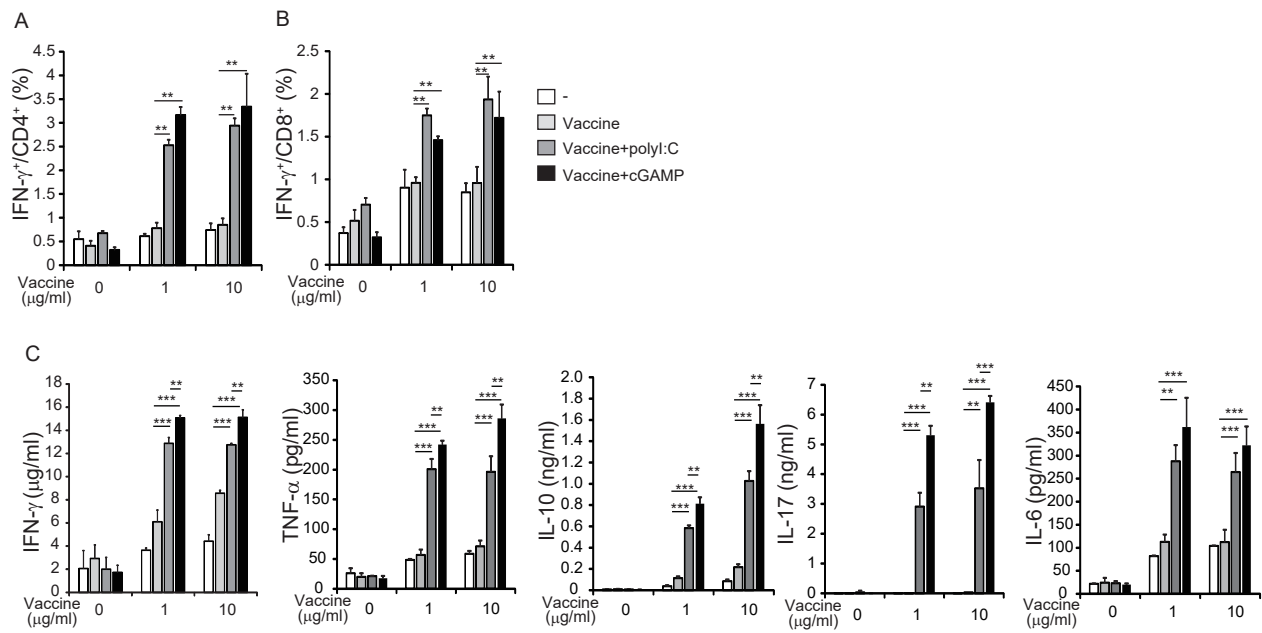

Takaki et. al., Figure 2

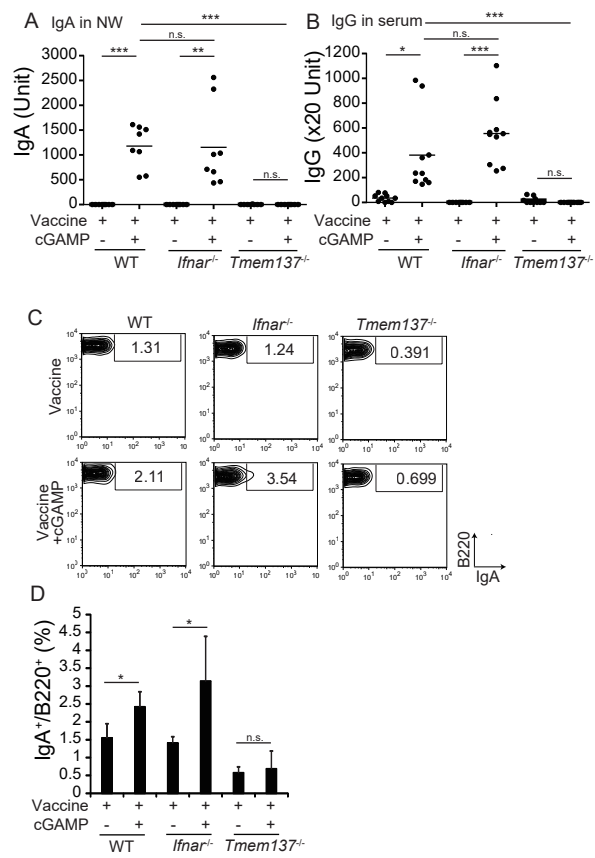

Takaki et. al., Figure 3

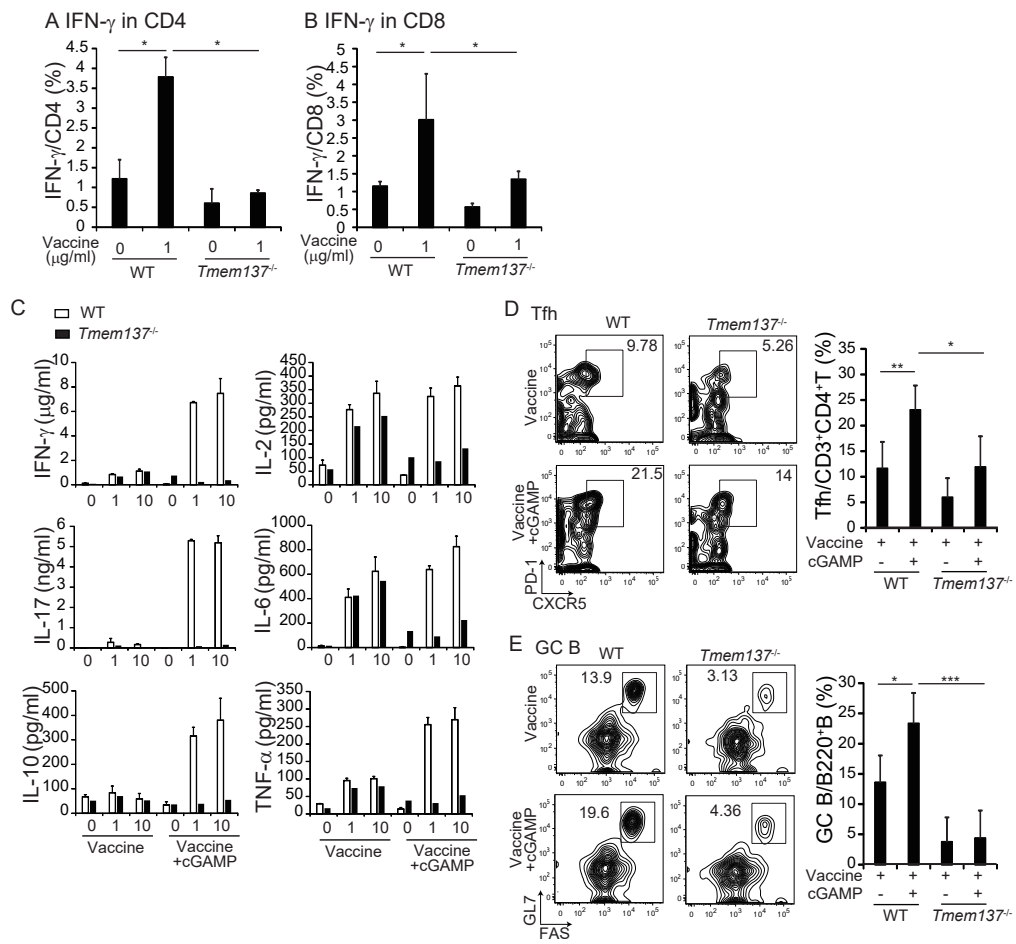

Takaki et. al., Figure 4

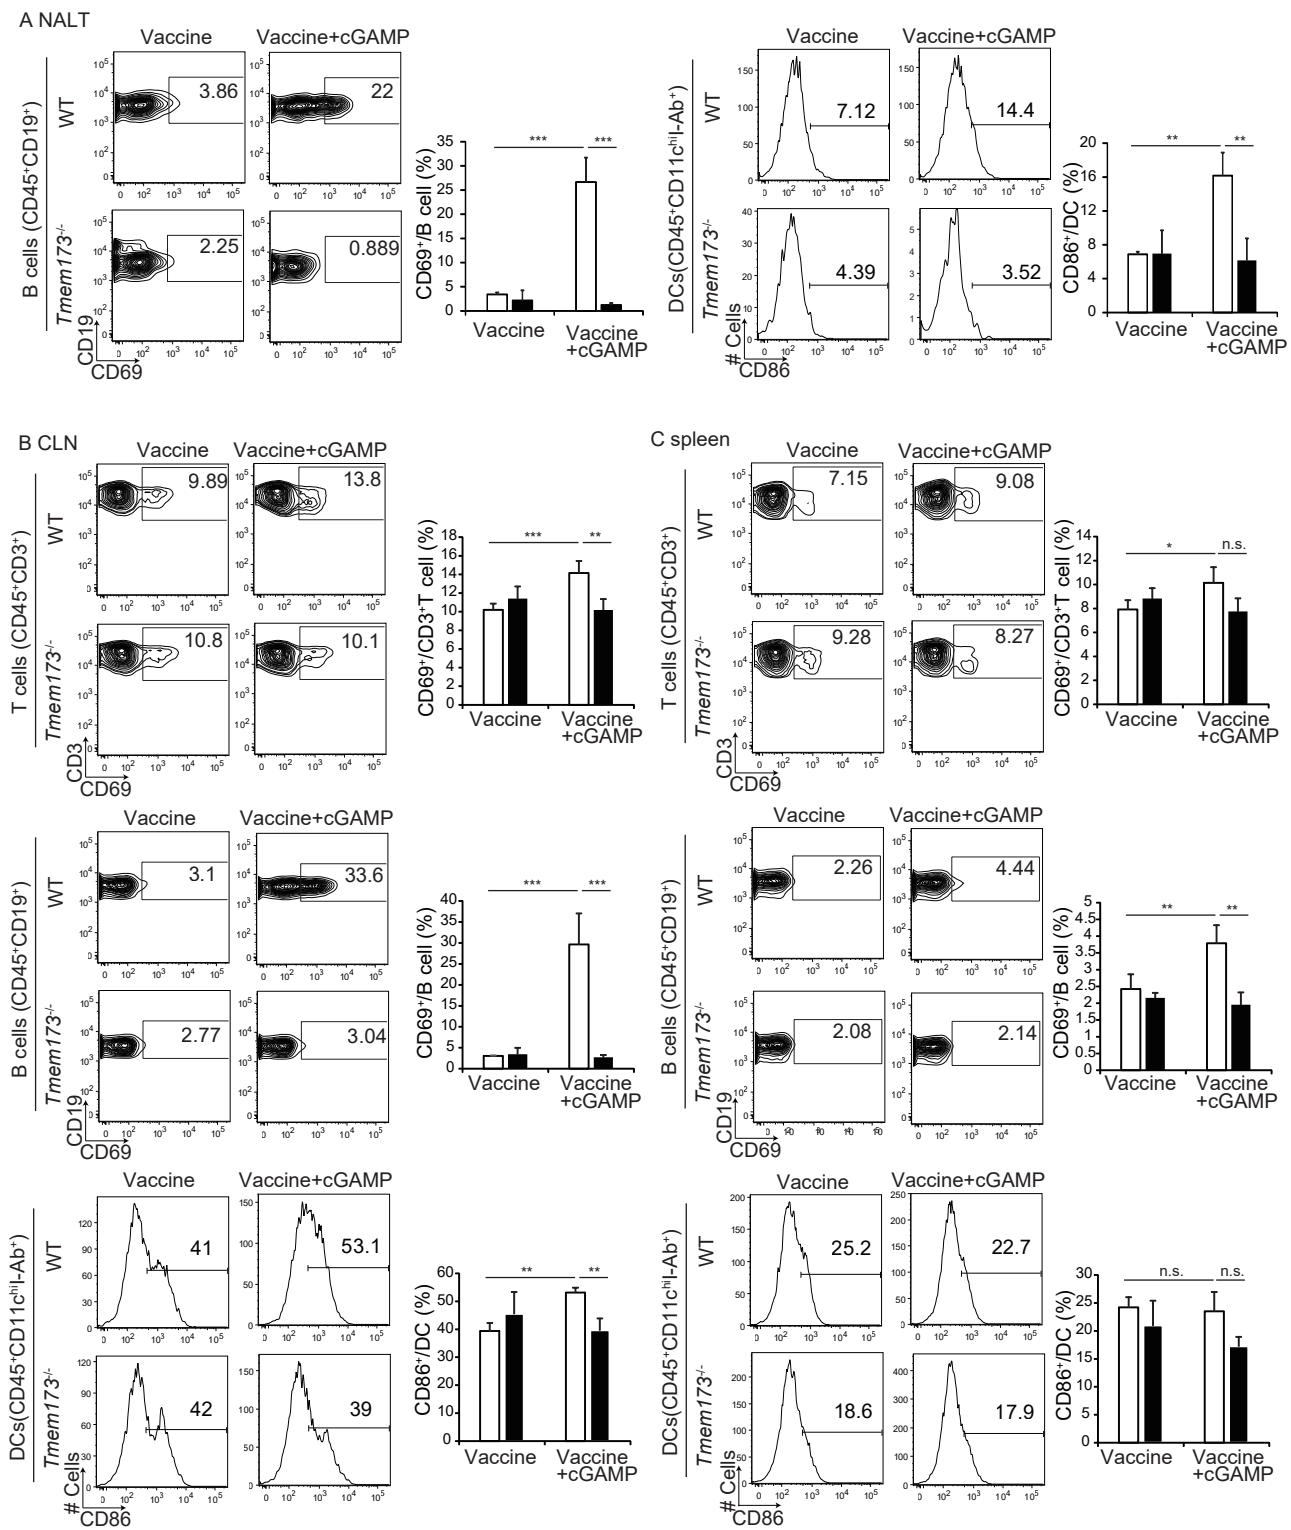

Takaki et. al., Figure 5

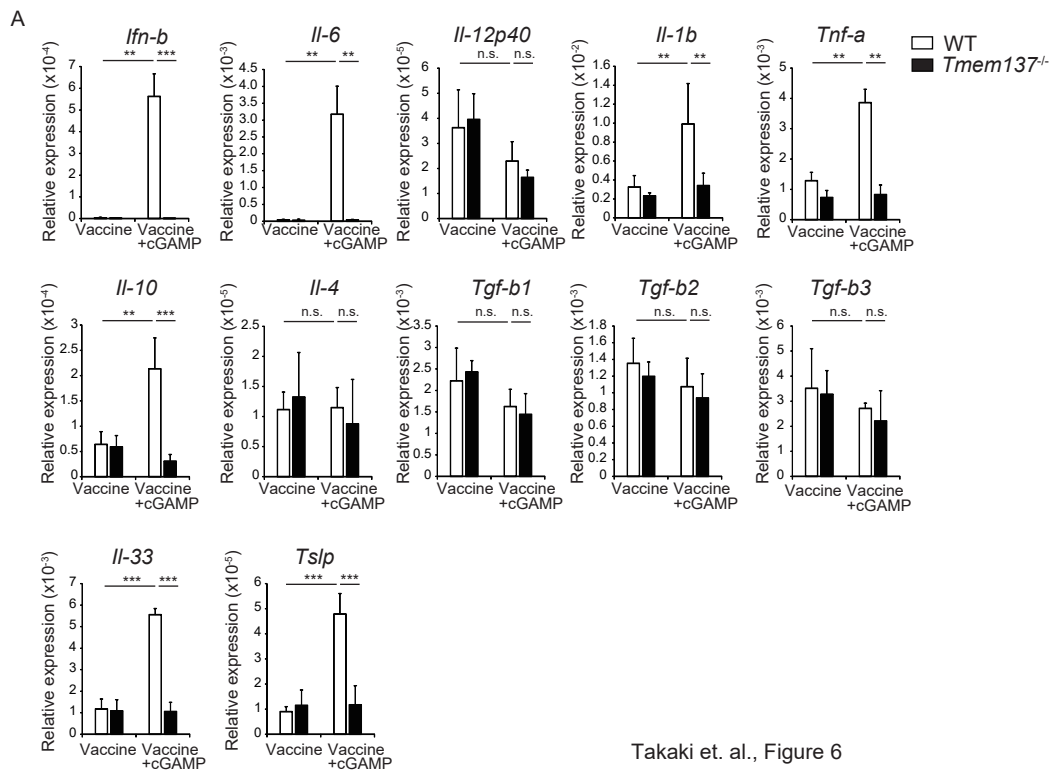

Takaki et. al., Figure 6

Supplementary Table S1. Primers' sequences

| Primers' name                     | sequences (5'-3')        |
|-----------------------------------|--------------------------|
| <i>Il4</i> Fw                     | ggtctcaacccccagctagt     |
| <i>Il4</i> Rv                     | gccgatgatctctctcaagtg    |
| <i>Il6</i> Fw                     | gttctctgggaaatcgtgga     |
| <i>Il6</i> Rv                     | tccagtttggtagcatccatc    |
| <i>Il10</i> Fw                    | ggcgctgtcatcgatttctc     |
| <i>Il10</i> Rv                    | tgctccactgccttgctcta     |
| <i>Ifnb</i> Fw                    | ccagctccaagaaaggacga     |
| <i>Ifnb</i> Rv                    | cgccctgtaggtgaggtgat     |
| <i>bactin</i> Fw                  | tttcagctccttcgttgc       |
| <i>bactin</i> Rv                  | tcgtcatccatggcgaact      |
| <i>Tgf-<math>\beta</math>1</i> Fw | gctgaaccaaggagacggaat    |
| <i>Tgf-<math>\beta</math>1</i> Rv | caagagcagtgagcgctgaa     |
| <i>Tgf-<math>\beta</math>2</i> Fw | tcccgaataaaaagcgaagagc   |
| <i>Tgf-<math>\beta</math>2</i> Rv | ggtgccatcaatacctgcaaa    |
| <i>Tgf-<math>\beta</math>3</i> Fw | ccagatacttcgaccggatga    |
| <i>Tgf-<math>\beta</math>3</i> Rv | tgacatcgaaagacagccattc   |
| <i>IL-12p40</i> Fw                | aatgtctgcgtgcaagctca     |
| <i>IL-12p40</i> Rv                | atgccacttgctgcatga       |
| <i>Il1b</i> Fw                    | tgacggaccccaaaagatga     |
| <i>IL1b</i> Rv                    | tgctgctgcgagatttgaag     |
| <i>Tnfa</i> Fw                    | aatggcctccctctcatcagt    |
| <i>Tfna</i> Rv                    | gctacaggcttgctactgaatt   |
| <i>Il33</i> Fw                    | tcctgtctgtattgagaaacctga |
| <i>Il33</i> Rv                    | tattttgcaaggcgggacca     |
| <i>Ts/p</i> Fw                    | ggactgtgagagcaagccag     |
| <i>Ts/p</i> Rv                    | tccgggcaaagtgtttgtcg     |
